# Supplementary material for: Ionic liquid redox electrolytes based on binary mixtures of 1-alkyl-methylimidazolium tricyanomethanide with 1-methyl-3-propylimidazolium iodide and implication in dye-sensitized solar cells
Source: Royal Society of Chemistry journal article supplement (doi:10.1039/c3ta00117b), 2013-01-01
Supplement: c3ta00117b.pdf [file c3ta00117b.pdf]

Supplementary material (ESI) for Journal of Materials Chemistry A  
This journal is © The Royal Society of Chemistry 2012

# Ionic liquid redox electrolytes based on binary mixtures of 1-alkyl- methylimidazolium tricyanomethanide with 1-methyl-3- propylimidazolium iodide and implication in dye-sensitized solar cells

*Maria Bidikoudi<sup>a</sup>, Thomas Stergiopoulos<sup>\*a</sup>, Vlassis Likodimos<sup>a</sup>, Georgios Em. Romanos<sup>a</sup>, Maria Francisco<sup>b</sup>, Boyan Iliev<sup>c</sup>, Gabriela Adamová<sup>c</sup>, Thomas J. S. Schubert<sup>c</sup> and Polycarpos Falaras<sup>\*a</sup>*

<sup>a</sup> Institute of Advanced Materials, Physicochemical Processes, Nanotechnology and Microsystems (IAMPPNM), Division of Physical Chemistry, National Center for Scientific Research

"Demokritos", 153 10 Aghia Paraskevi Attikis, Athens, Greece. E-mail: [papi@chem.demokritos.gr](mailto:papi@chem.demokritos.gr);  
+30-2106503644; +20-2106511766.

<sup>b</sup> Dept. Chemical Engineering and Chemistry, Eindhoven University of Technology, Den Dolech 2,  
5612 AZ, P.O. Box 513, STO 1.21, 5600 MB Eindhoven, The Netherlands.

<sup>c</sup> IOLITEC, Ionic Liquids Technologies GmbH, Salzstraße 184, D-74076 Heilbronn, Germany.

Corresponding authors: Thomas Stergiopoulos ([stergt@chem.demokritos.gr](mailto:stergt@chem.demokritos.gr)) and Polycarpos Falaras  
([papi@chem.demokritos.gr](mailto:papi@chem.demokritos.gr)).

Supplementary material (ESI) for Journal of Materials Chemistry A  
This journal is © The Royal Society of Chemistry 2012

**Table S1:** Experimental values for viscosities and densities as a function of temperature for ionic liquid blend C2

| <b>T(K)</b>   | <b><math>\eta</math> (mPas)</b> | <b>kvisc(mm<sup>2</sup>s)</b> | <b><math>\rho</math>(g/cm<sup>3</sup>)</b> |
|---------------|---------------------------------|-------------------------------|--------------------------------------------|
| <b>293.15</b> | 172.910                         | 123.860                       | 1.3961                                     |
| <b>298.15</b> | 125.700                         | 90.298                        | 1.3921                                     |
| <b>303.15</b> | 93.884                          | 67.635                        | 1.3881                                     |
| <b>308.15</b> | 71.817                          | 51.887                        | 1.3841                                     |
| <b>313.15</b> | 56.198                          | 40.719                        | 1.3801                                     |
| <b>318.15</b> | 44.811                          | 32.562                        | 1.3762                                     |
| <b>323.15</b> | 36.356                          | 26.495                        | 1.3722                                     |
| <b>328.15</b> | 29.956                          | 21.894                        | 1.3683                                     |
| <b>333.15</b> | 25.024                          | 18.342                        | 1.3643                                     |
| <b>338.15</b> | 21.183                          | 15.571                        | 1.3604                                     |
| <b>343.15</b> | 18.126                          | 13.362                        | 1.3565                                     |
| <b>348.14</b> | 15.664                          | 11.580                        | 1.3527                                     |
| <b>353.14</b> | 13.654                          | 10.123                        | 1.3488                                     |
| <b>358.14</b> | 12.000                          | 8.922                         | 1.3450                                     |
| <b>363.14</b> | 10.629                          | 7.925                         | 1.3412                                     |

Supplementary material (ESI) for Journal of Materials Chemistry A  
This journal is © The Royal Society of Chemistry 2012

**Table S2:** Experimental values for viscosities and densities as a function of temperature for ionic liquid blend C4

| <b>T(K)</b>   | <b><math>\eta</math> (mPas)</b> | <b>kvisc(mm<sup>2</sup>s)</b> | <b><math>\rho</math>(g/cm<sup>3</sup>)</b> |
|---------------|---------------------------------|-------------------------------|--------------------------------------------|
| <b>293.15</b> | 272.21                          | 196.36                        | 1.3863                                     |
| <b>298.15</b> | 192.8                           | 139.48                        | 1.3823                                     |
| <b>303.15</b> | 140.56                          | 101.98                        | 1.3783                                     |
| <b>308.15</b> | 105.28                          | 76.604                        | 1.3744                                     |
| <b>313.15</b> | 80.485                          | 58.727                        | 1.3705                                     |
| <b>318.15</b> | 62.897                          | 46.025                        | 1.3666                                     |
| <b>323.15</b> | 50.074                          | 36.746                        | 1.3627                                     |
| <b>328.15</b> | 40.561                          | 29.85                         | 1.3588                                     |
| <b>333.15</b> | 33.348                          | 24.613                        | 1.3549                                     |
| <b>338.14</b> | 27.825                          | 20.0595                       | 1.351                                      |
| <b>343.15</b> | 23.498                          | 17.442                        | 1.3472                                     |
| <b>348.14</b> | 20.067                          | 14.938                        | 1.3434                                     |
| <b>353.14</b> | 17.284                          | 12.903                        | 1.3396                                     |
| <b>358.14</b> | 15.022                          | 11.245                        | 1.3358                                     |
| <b>363.15</b> | 13.148                          | 9.8706                        | 1.3321                                     |

Supplementary material (ESI) for Journal of Materials Chemistry A  
This journal is © The Royal Society of Chemistry 2012

**Table S3:** Experimental values for viscosities and densities as a function of temperature for ionic liquid blend C6

| <b>T(K)</b>   | <b><math>\eta</math> (mPas)</b> | <b>kvisc(mm<sup>2</sup>s)</b> | <b><math>\rho</math>(g/cm<sup>3</sup>)</b> |
|---------------|---------------------------------|-------------------------------|--------------------------------------------|
| <b>293.15</b> | 364.63                          | 264.7                         | 1.3776                                     |
| <b>298.15</b> | 253.74                          | 184.74                        | 1.3734                                     |
| <b>303.15</b> | 181.88                          | 132.81                        | 1.3695                                     |
| <b>308.15</b> | 134.08                          | 98.187                        | 1.3656                                     |
| <b>313.15</b> | 101.22                          | 74.331                        | 1.3617                                     |
| <b>318.15</b> | 78.069                          | 57.493                        | 1.3579                                     |
| <b>323.15</b> | 61.398                          | 45.345                        | 1.354                                      |
| <b>328.15</b> | 49.3128                         | 36.387                        | 1.3502                                     |
| <b>333.15</b> | 39.944                          | 29.669                        | 1.3463                                     |
| <b>338.15</b> | 32.927                          | 24.526                        | 1.3425                                     |
| <b>343.15</b> | 27.519                          | 20.556                        | 1.3387                                     |
| <b>348.14</b> | 23.27                           | 1.3387                        | 1.3349                                     |
| <b>353.14</b> | 19.877                          | 14.932                        | 1.3312                                     |
| <b>358.14</b> | 17.142                          | 12.914                        | 1.3274                                     |
| <b>363.15</b> | 14.913                          | 11.266                        | 1.3237                                     |

Supplementary material (ESI) for Journal of Materials Chemistry A  
This journal is © The Royal Society of Chemistry 2012

**Table S4:** Experimental values for viscosities and densities as a function of temperature for ionic liquid blend C8

| <b>T(K)</b>   | <b><math>\eta</math>(mPas)</b> | <b>kvisc(mm<sup>2</sup>s)</b> | <b><math>\rho</math>(g/cm<sup>3</sup>)</b> |
|---------------|--------------------------------|-------------------------------|--------------------------------------------|
| <b>293.15</b> | 419.49                         | 305.57                        | 1.3728                                     |
| <b>298.15</b> | 292.57                         | 213.76                        | 1.3687                                     |
| <b>303.15</b> | 209.04                         | 153.17                        | 1.3648                                     |
| <b>308.15</b> | 153.33                         | 112.68                        | 1.3609                                     |
| <b>313.15</b> | 115.15                         | 84.857                        | 1.357                                      |
| <b>318.15</b> | 88.351                         | 65.292                        | 1.3532                                     |
| <b>323.15</b> | 69.11                          | 51.21                         | 1.3493                                     |
| <b>328.15</b> | 55.033                         | 40.901                        | 1.3455                                     |
| <b>333.15</b> | 44.531                         | 33.19                         | 1.3417                                     |
| <b>338.15</b> | 36.558                         | 27.325                        | 1.3379                                     |
| <b>343.15</b> | 30.394                         | 22.785                        | 1.3341                                     |
| <b>348.15</b> | 25.581                         | 19.229                        | 1.3303                                     |
| <b>353.15</b> | 21.76                          | 16.403                        | 1.3266                                     |
| <b>358.15</b> | 18.694                         | 14.132                        | 1.3229                                     |
| <b>363.15</b> | 16.208                         | 12.286                        | 1.3192                                     |

Supplementary material (ESI) for Journal of Materials Chemistry A  
This journal is © The Royal Society of Chemistry 2012

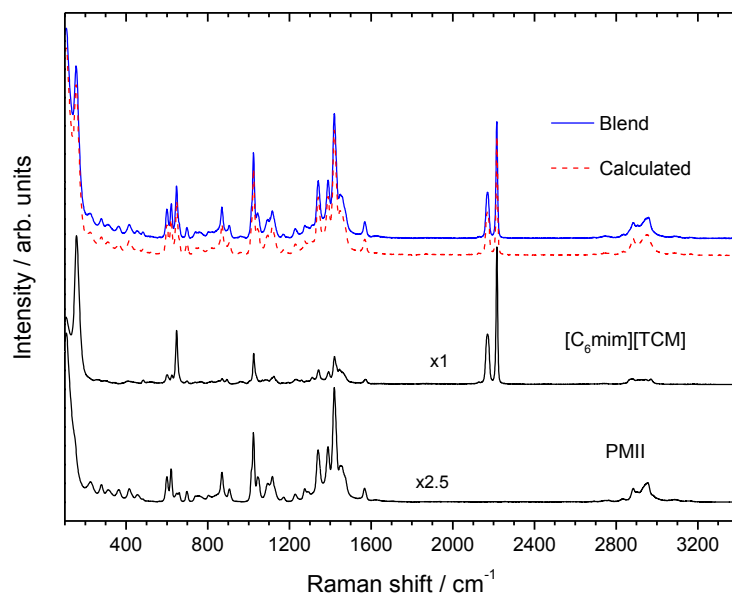

**Figure S1.** Raman spectrum of the PMII/[C<sub>6</sub>mim][TCM] blend compared to those of pure IL components. The dashed curve corresponds to the calculated mole fraction weighted sums of the neat PMII and [C<sub>6</sub>mim][TCM] components.

Supplementary material (ESI) for Journal of Materials Chemistry A  
This journal is © The Royal Society of Chemistry 2012

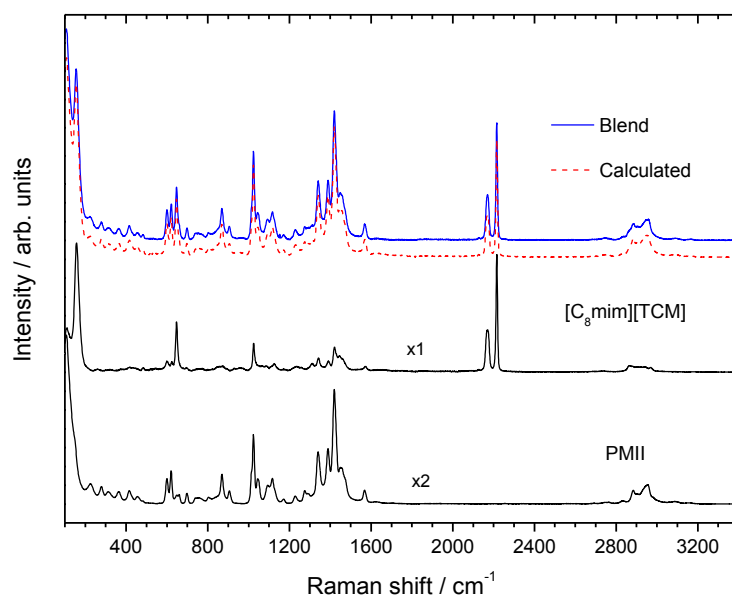

**Figure S2.** Raman spectrum of the PMII/[C<sub>8</sub>mim][TCM] blend compared to those of pure IL components. The dashed curve corresponds to the calculated mole fraction weighted sums of the neat PMII and [C<sub>6</sub>mim][TCM] components.

Supplementary material (ESI) for Journal of Materials Chemistry A  
This journal is © The Royal Society of Chemistry 2012

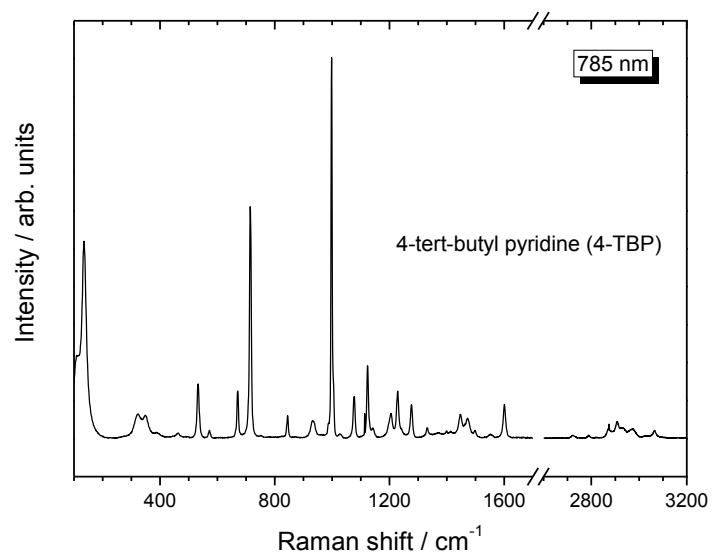

**Figure S3.** Raman spectrum of the 4-tert-butyl pyridine at 785 nm.



Supplementary material (ESI) for Journal of Materials Chemistry A  
This journal is © The Royal Society of Chemistry 2012

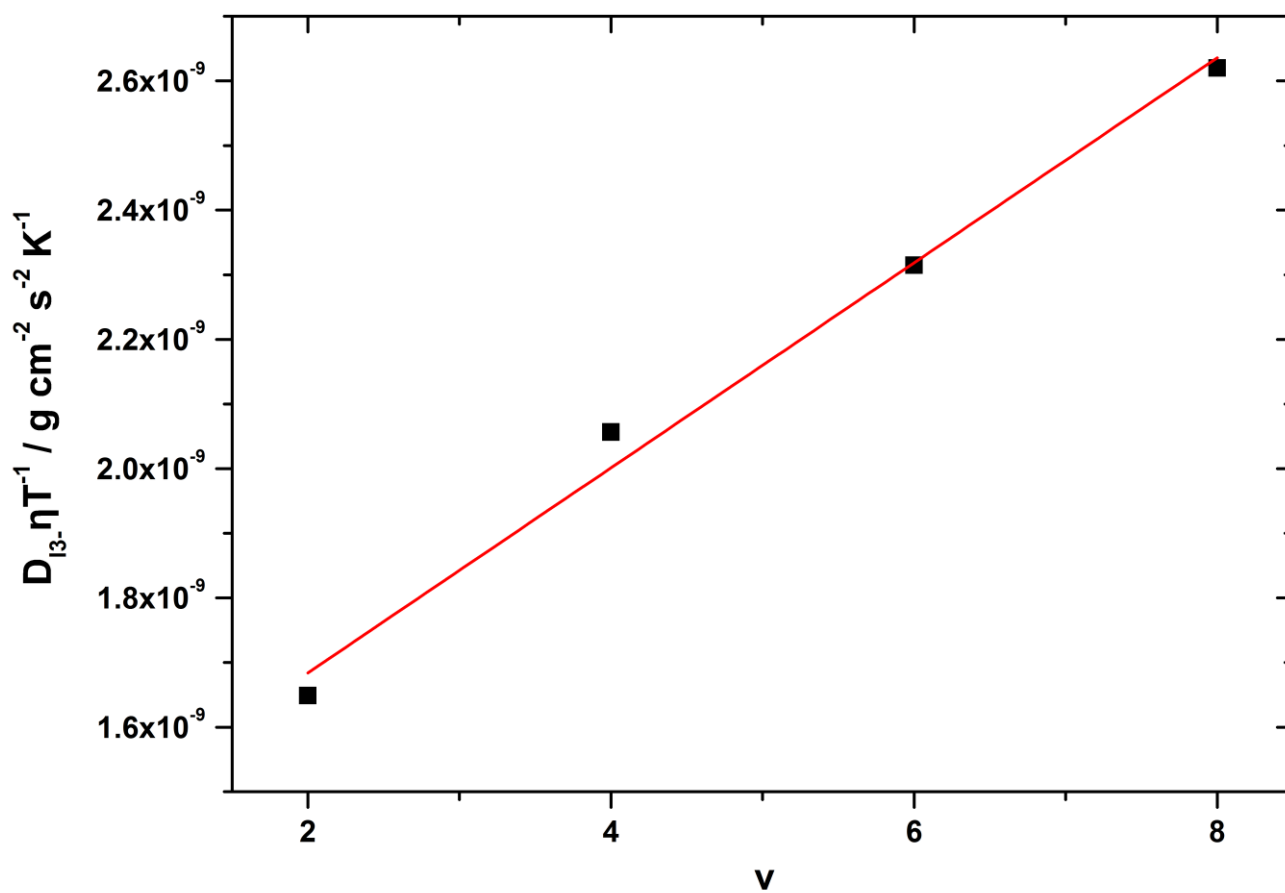

**Figure S4.** Stokes–Einstein ratios for ionic liquid 1-alkyl-3-methylimidazolium tricyanomethanide ( $C_v\text{mimTCM}$ )-based blends at room temperature as a function of the increasing alkyl length (and thus the viscosity) of the  $C_v\text{mimTCM}$ . A linear trend line is shown as a guide to the eye.

Supplementary material (ESI) for Journal of Materials Chemistry A  
This journal is © The Royal Society of Chemistry 2012

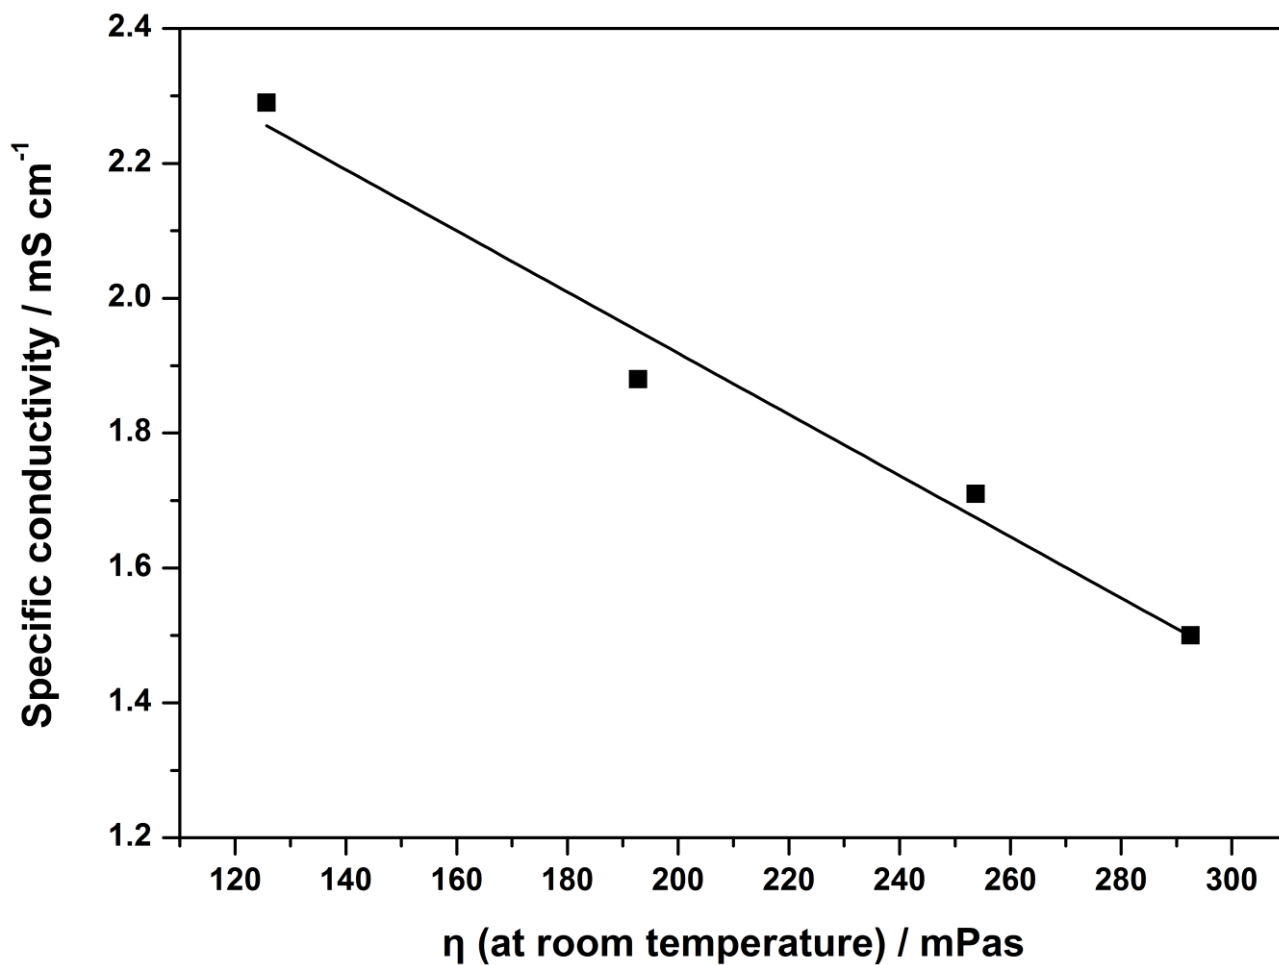

**Figure S5.** Specific conductivity ( $\kappa$ ) as a function of the viscosity (by increasing the alkyl length of  $C_v$ ) of the  $C_v$ mimTCM-based blends at room temperature. A linear trend line is shown as a guide to the eye.

Supplementary material (ESI) for Journal of Materials Chemistry A  
This journal is © The Royal Society of Chemistry 2012

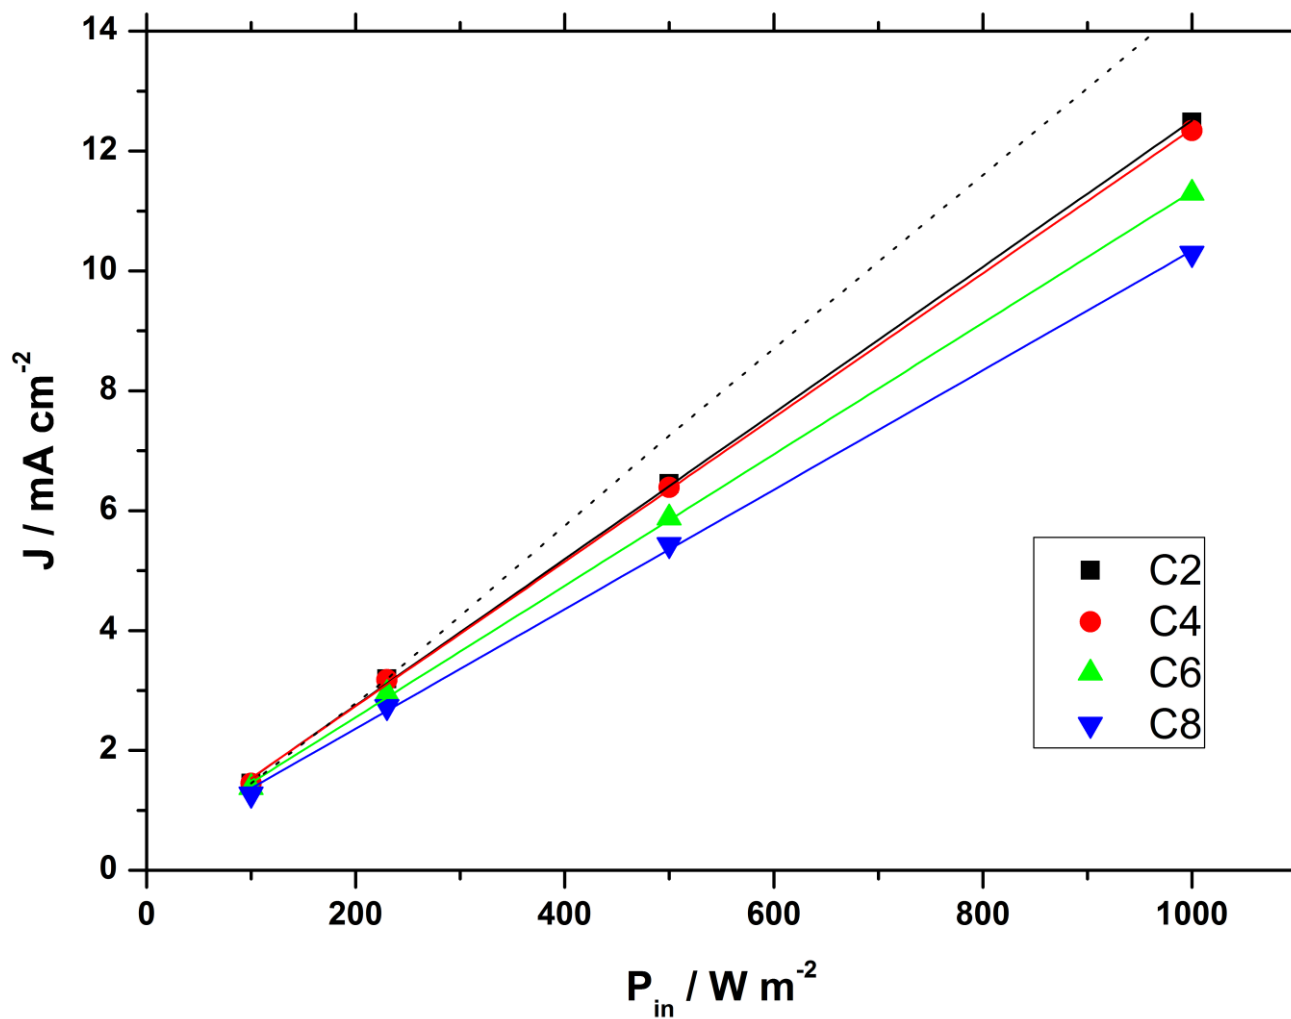

**Figure S6.** Short-circuit photocurrent ( $J_{sc}$ ) plotted against the light power density ( $P_{in}$ ) for the different ionic liquid electrolytes. The black dotted line represents the ideal linear behavior that should have been observed for C2-electrolyte.

Supplementary material (ESI) for Journal of Materials Chemistry A  
This journal is © The Royal Society of Chemistry 2012

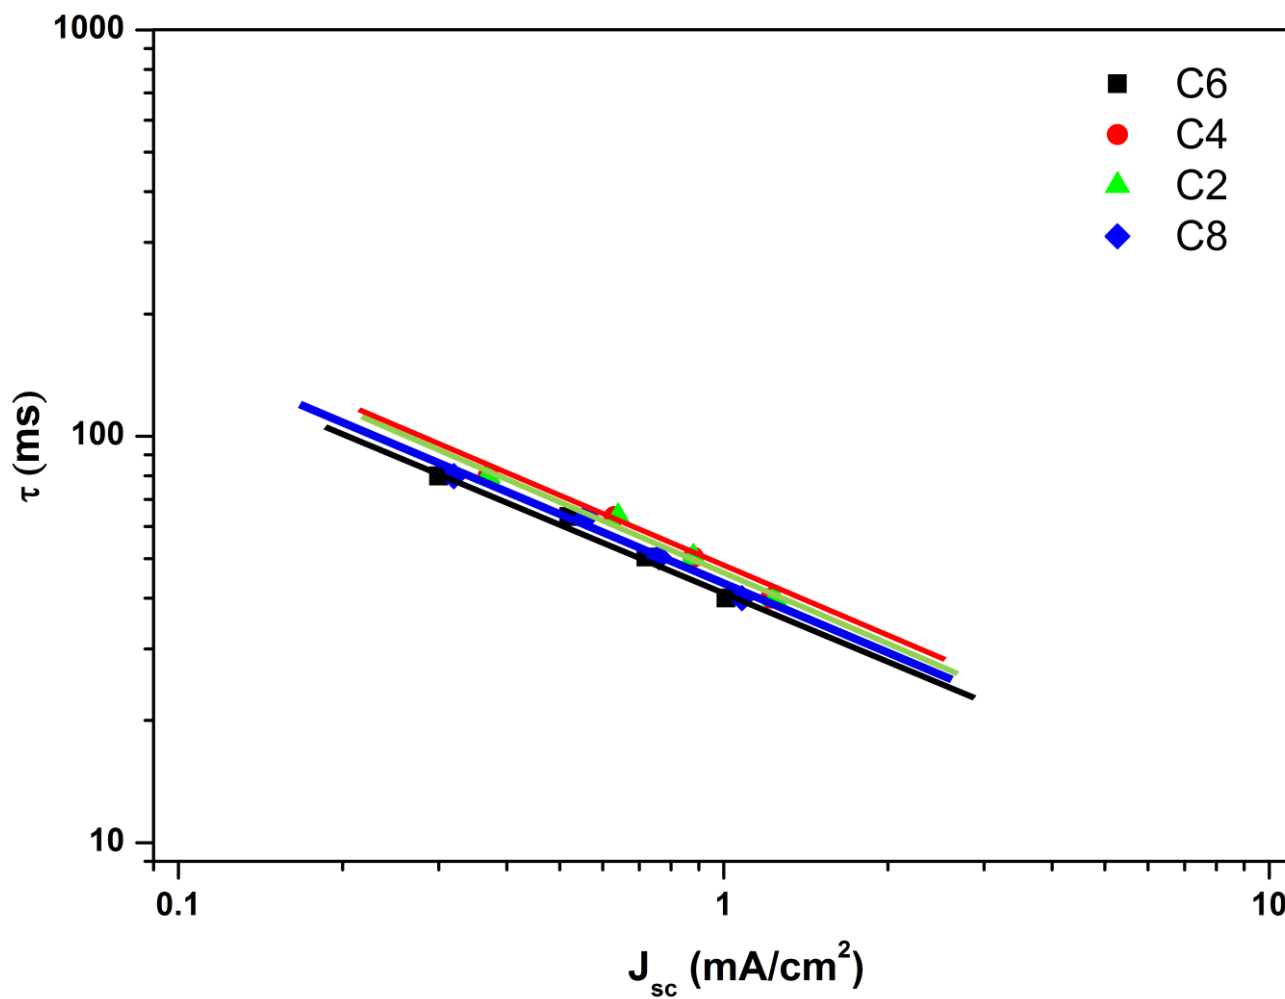

**Figure S7.** Electron transit times ( $\tau$ ) calculated from IMPS versus  $J_{sc}$  (in log-log scale) delivered by the DSCs, incorporating the different ionic liquid electrolytes.

Supplementary material (ESI) for Journal of Materials Chemistry A  
This journal is © The Royal Society of Chemistry 2012

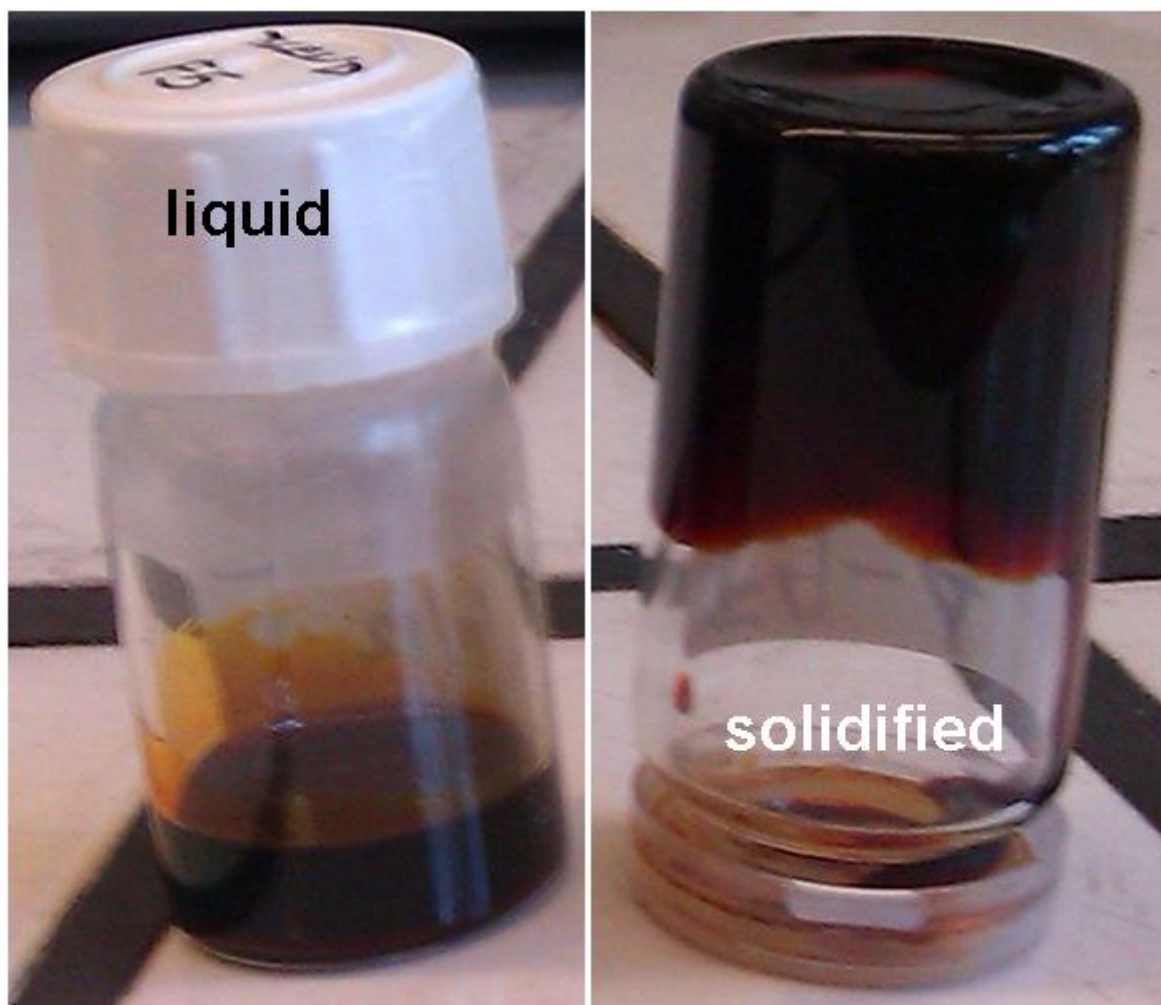

**Figure S8.** Characteristic macroscopical images of liquid and solidified electrolytes (the reference ionic-liquid based electrolyte is depicted on the left while the one solidified with silica nanopowder is shown on the right).

Supplementary material (ESI) for Journal of Materials Chemistry A  
This journal is © The Royal Society of Chemistry 2012

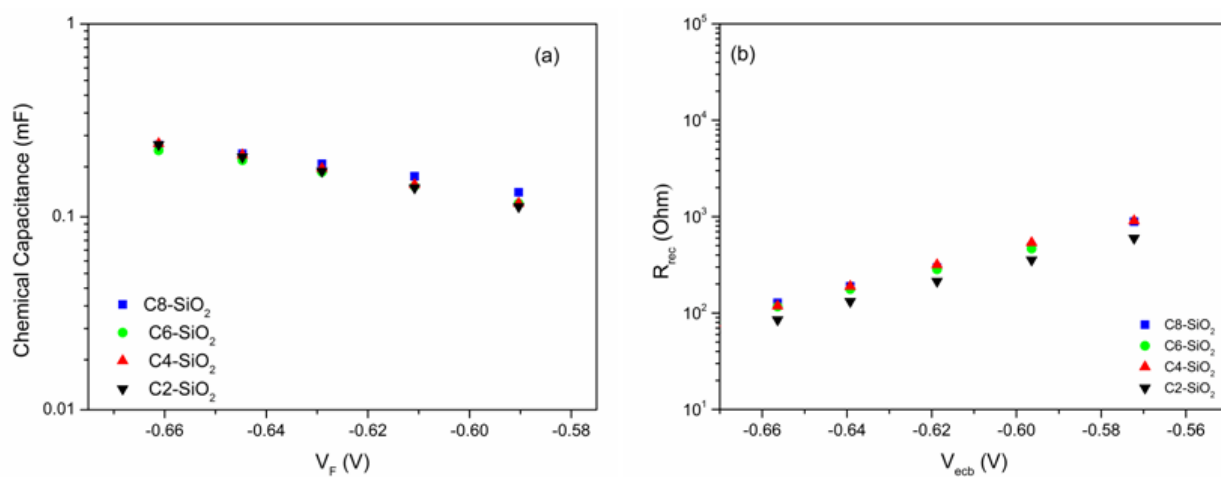

**Figure S9.** (a) Chemical capacitance ( $C_\mu$ ) plotted against  $V_F$  and (b) recombination resistance ( $R_{rec}$ ) plotted against  $V_{ECB}$  for various solidified electrolytes.

Supplementary material (ESI) for Journal of Materials Chemistry A  
This journal is © The Royal Society of Chemistry 2012

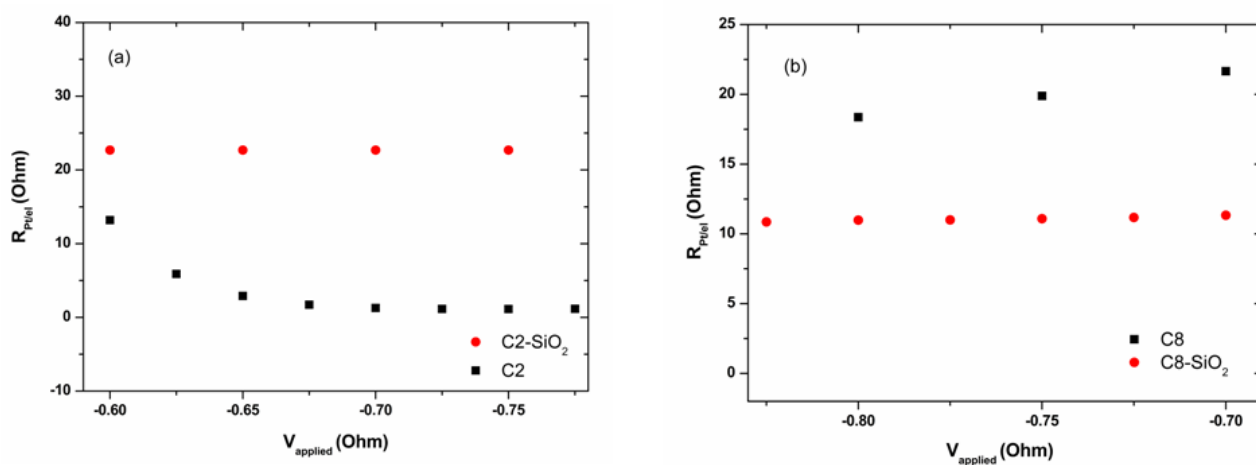

**Figure S10.** Resistance at the counter electrode/electrolyte interface ( $R_{pt}$ ) plotted against the applied potential ( $V_{applied}$ ) for electrolytes C2 (a) and C8 (b) prior and after the addition of SiO<sub>2</sub> nanoparticles.
